# Supplementary material for: Diagnostic Accuracy of Abbreviated Bi-Parametric MRI (a-bpMRI) for Prostate Cancer Detection and Screening: A Multi-Reader Study
Source: MDPI journal article supplement (doi:10.3390/diagnostics12020231), 2022-01-18
Supplement: s1 [file s1]

### Supplementary material

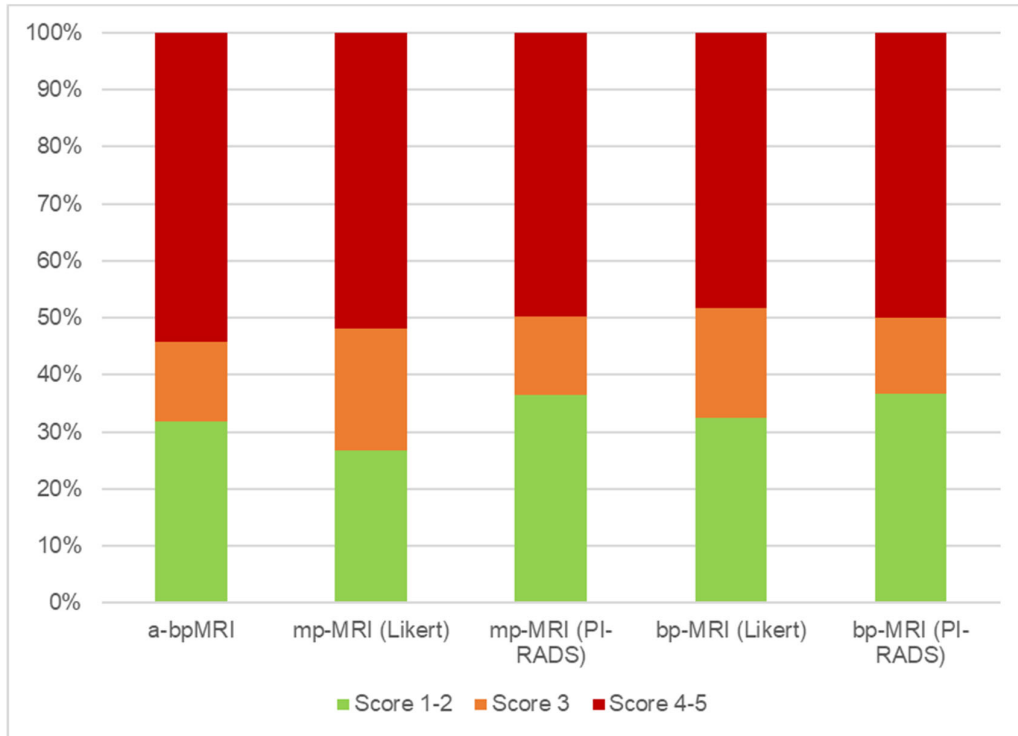

**Figure S1.** Proportions of MRI scores. MRI scores were grouped as follows: score 1-2, 3 and 4-5. MRI score distribution for a-bpMRI was 32%, 14% and 54%, respectively; for mp-MRI Likert scores was 27%, 21% and 52%, respectively; for mp-MRI PI-RADS scores was 36%, 14% and 50%; for bp-MRI Likert scores was 32%, 19% and 48%, respectively; for bp-MRI PI-RADS scores was 37%, 13% and 50%. Proportions are on the total number of patients included in the study (n = 151).

**Table S1.** MRI protocol details

| Sequence           | TR (ms) | TE (ms) | FoV (mm) | Slice thickness (mm) | Gap (mm) |
|--------------------|---------|---------|----------|----------------------|----------|
| T2 TSE coronal     | 6128    | 100     | 180      | 3                    | 3        |
| T2 TSE axial       | 5407    | 100     | 180      | 3                    | 0        |
| T1W TSE            | 487     | 8       | 240      | 3                    | 3        |
| DWI 0 150 500 1000 | 2753    | 80      | 220      | 5                    | 0        |
| DWI b2000          | 2000    | 78      | 220      | 5                    | 0        |
| DCE                | 5.8     | 2.8     | 180      | 3                    | 0        |

**Table S2. Diagnostic accuracy of MRI.**

|                                                                                                        | <b>a-bpMRI</b> | <b>bp-MRI<br/>(Likert)</b> | <b>bp-MRI<br/>(PI-RADS)</b> | <b>mp-MRI<br/>(Likert)</b> | <b>mp-MRI<br/>(PI-RADS)</b> |
|--------------------------------------------------------------------------------------------------------|----------------|----------------------------|-----------------------------|----------------------------|-----------------------------|
| <i>Gleason <math>\geq 3+4</math> and/or MCCL <math>\geq 4</math> mm (definition 2); prevalence 63%</i> |                |                            |                             |                            |                             |
| Sensitivity                                                                                            | 87 (83-91)     | 89 (85-93)                 | 84 (79-88)                  | 89 (85-93)                 | 84 (79-88)                  |
| Specificity                                                                                            | 65 (57-72)*    | 55 (48-63)                 | 70 (62-76)                  | 54 (46-62)                 | 71 (64-78)                  |
| PPV                                                                                                    | 81 (76-85)     | 77 (72-82)                 | 82 (78-87)                  | 77 (72-81)                 | 83 (79-87)                  |
| NPV                                                                                                    | 75 (67-82)     | 75 (66-82)                 | 72 (65-79)                  | 75 (67-83)                 | 73 (65-79)                  |
| <i>Any Gleason <math>\geq 3+4</math>; prevalence 50%</i>                                               |                |                            |                             |                            |                             |
| Sensitivity                                                                                            | 88 (83-92)     | 90 (86-94)                 | 86 (81-90)                  | 91 (86-94)                 | 86 (81-90)                  |
| Specificity                                                                                            | 52 (45-59) * ‡ | 44 (39-52)                 | 58 (51-64)                  | 44 (38-51)                 | 59 (52-66)                  |
| PPV                                                                                                    | 65 (59-70)     | 63 (57-68)                 | 67 (62-73)                  | 62 (57-68)                 | 68 (62-73)                  |
| NPV                                                                                                    | 81 (73-87)     | 82 (74-89)                 | 80 (73-86)                  | 83 (75-89)                 | 81 (74-86)                  |

Pooled values are reported as % (95%-CI). \* $p < 0.05$  a-bpMRI vs bp/mp-MRI Likert. ‡  $p < 0.05$  a-bpMRI vs bp/mp-MRI PI-RADS. bp-MRI: biparametric MRI; mp-MRI: multiparametric MRI; a-bpMRI: abbreviated biparametric MRI; PPV: positive predictive value; NPV: negative predictive value; MCCL: maximum cancer core length.

**Table S3. Diagnostic accuracy of a-bpMRI (combined scores)**

|                                             | <b>Definition 2 csPCa*</b> | <b>Any Gleason <math>\geq 3+4</math></b> |
|---------------------------------------------|----------------------------|------------------------------------------|
| <i>MRI score <math>\geq 4</math></i>        |                            |                                          |
| Sens                                        | 76 (67-84)                 | 78 (68-87)                               |
| Spec                                        | 80 (70-91)                 | 68 (57-79)                               |
| PPV                                         | 87 (79-94)                 | 71 (61-81)                               |
| NPV                                         | 66 (55-77)                 | 75 (65-85)                               |
| <i>T2 and DWI score <math>\geq 4</math></i> |                            |                                          |
| Sens                                        | 60 (50-70)                 | 62 (51-73)                               |
| Spec                                        | 91 (84-99)                 | 80 (71-89)                               |
| PPV                                         | 91 (85-99)                 | 76 (65-86)                               |
| NPV                                         | 57 (47-68)                 | 67 (58-77)                               |

Values are reported as % (95%-CI). \*Gleason  $\geq 3+4$  and/or MCCL  $\geq 4$  mm. PPV: positive predictive value; NPV: negative predictive value

**Table S4. Clinically significant lesions (definition 1) missed by MRI.**

|                       |                         |                  |          |
|-----------------------|-------------------------|------------------|----------|
|                       | Mp-MRI (Likert)         | Mp-MRI (PI-RADS) | a-bpMRI  |
|                       | Number (MCCL range, mm) |                  |          |
| MRI score ≥3          |                         |                  |          |
| Gleason 3+3           | 2 (7-10)                | 4 (6-10)         | 2 (6-10) |
| Gleason 3+4           | 1 (6)                   | 2 (6-10)         | 0        |
| Gleason 4+3           | 1 (4)                   | 1 (4)            | 1 (4)    |
| MRI score ≥4          |                         |                  |          |
| Gleason 3+3           | 4 (6-10)                | 6 (6-10)         | 5 (6-10) |
| Gleason 3+4           | 5 (6-10)                | 6 (6-10)         | 3 (6-10) |
| Gleason 4+3           | 1 (4)                   | 2 (4-8)          | 1 (4)    |
| T2WI and DWI score ≥4 |                         |                  |          |
| Gleason 3+3           | na                      | na               | 7 (6-10) |
| Gleason 3+4           | na                      | na               | 7 (6-12) |
| Gleason 4+3           | na                      | na               | 3 (4-8)  |

The table refers to MRI lesions missed by at least 2 out of 3 readers using different cut-off for MRI positivity. MCCL: maximum cancer core length; na: not assessed.

**Table S5. Interreader agreement (cut off: MRI score  $\geq 3$ ).**

|                         | <i>Mp-MRI (Likert)</i> | <i>Mp-MRI (PI-RADS)</i> | <i>Bp-MRI (Likert)</i> | <i>Bp-MRI (PI-RADS)</i> | <i>a-bpMRI</i>   |
|-------------------------|------------------------|-------------------------|------------------------|-------------------------|------------------|
| Gwet's AC1              | 0.59 (0.48-0.69)       | 0.65 (0.56-0.75)        | 0.58 (0.48-0.69)       | 0.61 (0.51-0.71)        | 0.58 (0.48-0.69) |
| Percentage of agreement | 75% (70-80)            | 81% (77-86)             | 75% (70-80)            | 79% (74-84)             | 76% (72-82)      |

Gwet's AC1: agreement coefficient which takes values between 0 to 1, similar to kappa.

Values in parentheses are 95%-CI.

mp-MRI: multiparametric MRI; a-bpMRI: abbreviated biparametric MRI.

**Table S6. Interreader agreement of a-bpMRI using alternative MRI cut-offs**

|                         | MRI score $\geq 4$ | T2 $\geq 4$ and DWI $\geq 4$ |
|-------------------------|--------------------|------------------------------|
| Gwet's AC1              | 0.59 (0.49-0.69)   | 0.64 (0.53-0.72)             |
| Percentage of agreement | 79% (74-84)        | 82% (77-87)                  |

Gwet's AC1: agreement coefficient which takes values between 0 to 1, similar to kappa.  
Values in parentheses are 95%-CI.

**Table S7. NPV and positivity rates of abbreviated bp-MRI (a-bpMRI) according to clinically significant PCa prevalence.**

|                                               | <i>Prevalence of csPCa</i> |             |              |
|-----------------------------------------------|----------------------------|-------------|--------------|
|                                               | 10%                        | 5%          | 2%           |
| <b>Definition 2 csPCa*</b>                    |                            |             |              |
| <i>MRI score <math>\geq 3</math></i>          |                            |             |              |
| Pos. rate                                     | 42 (34-50)                 | 38 (31-47)  | 37 (29-45)   |
| PPV                                           | 22 (13-34)                 | 12 (5-23)   | 5 (1-15)     |
| NPV                                           | 99 (94-100)                | 99 (94-100) | 100 (96-100) |
| <i>MRI score <math>\geq 4</math></i>          |                            |             |              |
| Pos. rate                                     | 25 (18-33)                 | 23 (16-30)  | 21 (14-28)   |
| PPV                                           | 29 (15-46)                 | 18 (7-35)   | 6 (1-21)     |
| NPV                                           | 96 (91-99)                 | 98 (94-100) | 99 (95-100)  |
| <i>T2WI and DWI score <math>\geq 4</math></i> |                            |             |              |
| Pos. rate                                     | 14 (9-20)                  | 12 (7-18)   | 10 (6-16)    |
| PPV                                           | 43 (22-66)                 | 28 (10-53)  | 13 (2-40)    |
| NPV                                           | 95 (90-98)                 | 98 (94-100) | 99 (96-100)  |
| <b>Any Gleason <math>\geq 3+4</math></b>      |                            |             |              |
| <i>MRI score <math>\geq 3</math></i>          |                            |             |              |
| Pos. rate                                     | 52 (44-60)                 | 50 (42-59)  | 49 (51-57)   |
| PPV                                           | 18 (10-28)                 | 9 (4-18)    | 4 (1-11)     |

|                                               |             |              |              |
|-----------------------------------------------|-------------|--------------|--------------|
| NPV                                           | 99 (93-100) | 100 (95-100) | 100 (95-100) |
| <i>MRI score <math>\geq 4</math></i>          |             |              |              |
| Pos. rate                                     | 37 (29-45)  | 34 (27-42)   | 32 (25-41)   |
| PPV                                           | 22 (12-35)  | 12 (4-23)    | 4 (0-14)     |
| NPV                                           | 97 (91-99)  | 98 (93-100)  | 99 (95-100)  |
| <i>T2WI and DWI score <math>\geq 4</math></i> |             |              |              |
| Pos. rate                                     | 24 (17-31)  | 22 (16-30)   | 21 (15-29)   |
| PPV                                           | 25 (12-42)  | 15 (5-31)    | 6 (1-21)     |
| NPV                                           | 95 (89-98)  | 97 (93-99)   | 99 (95-100)  |

Values are reported as % (95%-CI). \*Gleason  $\geq 3+4$  and/or MCCL  $\geq 4$  mm.

Pos. rate: rate of positive test according to MRI cut-off.

csPCa: clinically significant prostate cancer; pos. rate: positivity rate of MRI; PPV: positive predictive value; NPV: negative predictive value.
